# Supplementary material for: Museomics allows comparative analyses of mitochondrial genomes in the family Gryllidae (Insecta, Orthoptera) and confirms its phylogenetic relationships
Source: PeerJ journal article supplement (doi:10.7717/peerj.17734), 2024-08-08

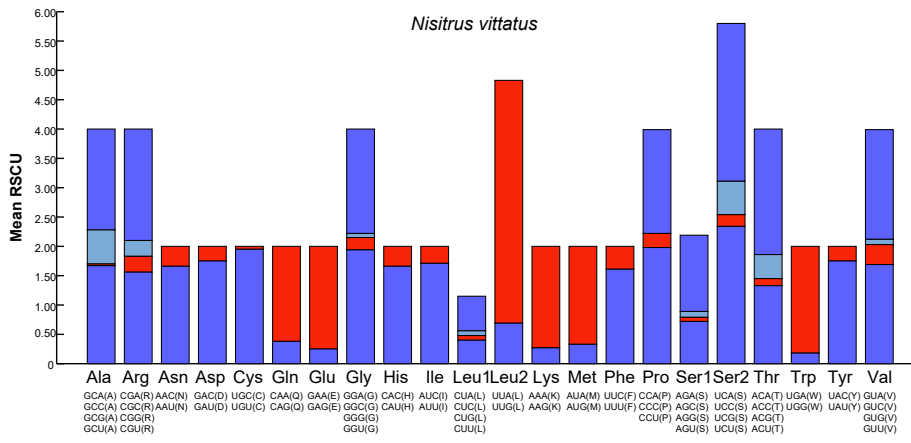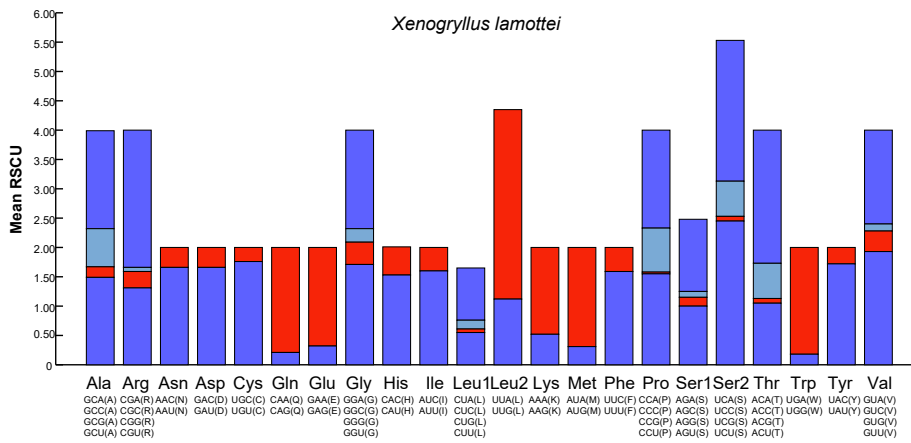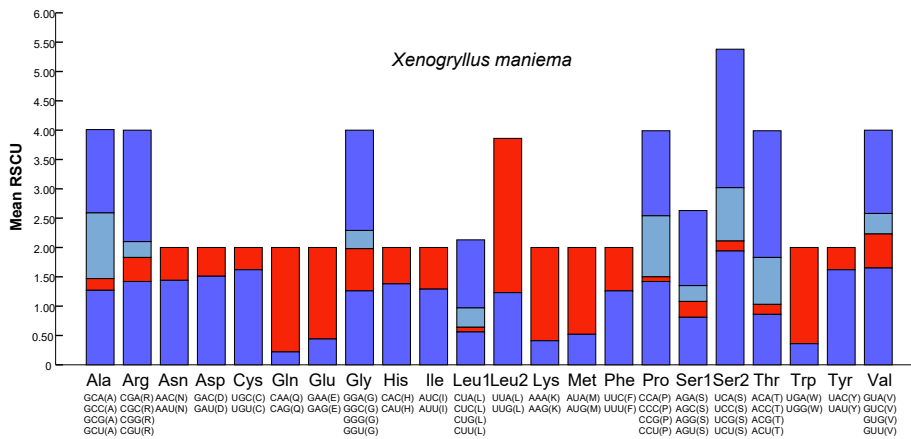

Supplement: Fig.S1.pdf [file Fig.S1.pdf]
