# Supplementary material for: Museomics allows comparative analyses of mitochondrial genomes in the family Gryllidae (Insecta, Orthoptera) and confirms its phylogenetic relationships
Source: PeerJ journal article supplement (doi:10.7717/peerj.17734), 2024-08-08
Supplement: Fig.S2_X36_tRNA.pdf [file Fig.S2_X36_tRNA.pdf]

|                                                                                                                                     |                                                                                                                                               |                                                                                                                          |                                                                                                                                           |                                                                                                                                |                                                                                                                                     |
|-------------------------------------------------------------------------------------------------------------------------------------|-----------------------------------------------------------------------------------------------------------------------------------------------|--------------------------------------------------------------------------------------------------------------------------|-------------------------------------------------------------------------------------------------------------------------------------------|--------------------------------------------------------------------------------------------------------------------------------|-------------------------------------------------------------------------------------------------------------------------------------|
| <pre> a a-t a-t t-a g-c g+t a-t a-t a t cgta ag g !!!! t t tcc gcat a !!!! t a agg a a a c t-aat t-a a-t t-a c-g t g t a gat </pre> | <pre> t t-a t-a a-t t-a g-c t-a c-g t-a tt ttatc a +!!!! a t tata gatag t g +!!!! a tt a gtat g t g a g+ta g+t g-c a-t a-t t a t a ttg </pre> | <pre> g a-t g-c a-t a-t a-t g+t a-t ta ttcc a !!!! c aaagg a t ta a agct a a a c a ac t-a g-c g-c g-c t c t a cat </pre> | <pre> t c-g t-a a-t a-t a-t g-c t-g tc-g t atccc c !!!! t a ttga taaaa c g !!!! a t a aact a a a a g.a t+g a-t g-c c-g c a t a tca </pre> | <pre> t g-c g-c t+g t-a t-a t-a t-a a catt !!!! a g actt gtaa t !!!!: t t tgat g a t g t-aa t-a a-t g-c a-t c t t a gca </pre> | <pre> a g-c a-t t+g a-t g-c a-t t a t a tctg !!!!+ a g tcg agat t t +!! t a a ggc a ata g t t-at t-a a-t a-t a-t t a t a gta </pre> |
| tRNA-Ile(gat)                                                                                                                       | tRNA-Gln(ttg)                                                                                                                                 | tRNA-Met(cat)                                                                                                            | tRNA-Trp(tca)                                                                                                                             | tRNA-Cys(gca)                                                                                                                  | tRNA-Tyr(gta)                                                                                                                       |

|                                                                                                                                             |                                                                                                                                                    |                                                                                                                               |                                                                                                                                     |                                                                                                                               |                                                                                                                            |
|---------------------------------------------------------------------------------------------------------------------------------------------|----------------------------------------------------------------------------------------------------------------------------------------------------|-------------------------------------------------------------------------------------------------------------------------------|-------------------------------------------------------------------------------------------------------------------------------------|-------------------------------------------------------------------------------------------------------------------------------|----------------------------------------------------------------------------------------------------------------------------|
| <pre> c a a-t c-g t-a a-t a-t t.t t.t a t tttct t ag g !!!!! t g acg aaaga t a !!!! t a tgc a g a a g+tt t-a g-c a-t a-t t a t g taa </pre> | <pre> a t-a c-g a-t t-a c-g a-t g-c a-t aa t tcatt c ag g !!!!! a a tca agtaa a a !!! t tt g agt a ta a a a att t-a g-c g-c t-a c a t a ctt </pre> | <pre> a a-t a-t g-c a-t a-t t taata c !!!! a a attg attat a a !!!! c a t taac t a a g t-aa t-a a-t a-t t-a a t t a gtc </pre> | <pre> a t-a g+t t-a c-g a-t a-t t-a a t aat a !!! t a tatg tta t t +!!!! t a a gtac g a a a c at t-a t-a g-c a-t t a t a tcc </pre> | <pre> a a-t g+t g-c a-t t-a a t taact a !!!! t c attg attga t t !!!! t t taac g a a a t-aa t-a t-a g-c a-t a c t a tgc </pre> | <pre> a a-t a-t a-t t-a g-c a ccaa a a !!!!! t tacg ggtt t t !!!! a a atgc a c a g t-aa t-a c-g a-t a-t t c t a tcg </pre> |
| tRNA-Leu(taa)                                                                                                                               | tRNA-Lys(ctt)                                                                                                                                      | tRNA-Asp(gtc)                                                                                                                 | tRNA-Gly(tcc)                                                                                                                       | tRNA-Ala(tgc)                                                                                                                 | tRNA-Arg(tcg)                                                                                                              |

|                                                                                                                                          |                                                                                                                                       |                                                                                                                                           |                                                                                                                                          |                                                                                                                                               |                                                                                                                                      |
|------------------------------------------------------------------------------------------------------------------------------------------|---------------------------------------------------------------------------------------------------------------------------------------|-------------------------------------------------------------------------------------------------------------------------------------------|------------------------------------------------------------------------------------------------------------------------------------------|-----------------------------------------------------------------------------------------------------------------------------------------------|--------------------------------------------------------------------------------------------------------------------------------------|
| <pre> a a-t t-a t-a t-a a-t t-a g+t t ttat a a a !!!!! t t tttg aata t t !!!! t t g aaac a a g g g-ca t-a a-t t-a a-t t t t g ttc </pre> | <pre> t a-t a-t g-c a-t a-t g+t t-a tt aag aattgcc a gt !!!!! a a ttagcgg t t t tt ta t aag c a-tt t-a g+t g-c g-c c a t a gct </pre> | <pre> g t-a t-a t-a a-t a-t t+g t+g g-c a cttaa a !!!!! g a cca gaatt a t !!! t t a ggt t ga a a t-atc a-t t-a t-a a-t t a t a gtt </pre> | <pre> t t-a a-t t-a t-a t+g a-t a-t g-c t ccgg a a !!!!! t t ttcg ggct g +!!! a t g gagt g a a g t-aa a-t a-t t-a a-t t a t g gaa </pre> | <pre> a t-a a-t t-a t+g t-a a-t a-t t tatta !!!! g a a !!!!! g t tttg ataat t +!!! a t t gaat g a g g t-aa t-a g-c a-t t+g t t t a gtg </pre> | <pre> t g-c t-a t-a t-a t-a a-t a-t a-t t ttc !!! t a tttg aag a a !!!!! t t a aaac t ta a a t-aa t-a g-c g-c t-a c a t a tgt </pre> |
| tRNA-Glu(ttc)                                                                                                                            | tRNA-Ser(gct)                                                                                                                         | tRNA-Asn(gtt)                                                                                                                             | tRNA-Phe(gaa)                                                                                                                            | tRNA-His(gtg)                                                                                                                                 | tRNA-Thr(tgt)                                                                                                                        |

|                                                                                                                                            |                                                                                                                                            |                                                                                                                                                |                                                                                                                                            |
|--------------------------------------------------------------------------------------------------------------------------------------------|--------------------------------------------------------------------------------------------------------------------------------------------|------------------------------------------------------------------------------------------------------------------------------------------------|--------------------------------------------------------------------------------------------------------------------------------------------|
| <pre> a t-a c-g a-t g-c a-t g-c a-t g+t t ttct a a !!!!! a g tttg agga t +!!!! t t g aaat a ta a g t-at t-a a-t a-t t-a t g t g tgg </pre> | <pre> t a-t a-t g-c t-a g-c a-t t-a aat a tcctt t t a !!!!! a tcg agaa a a !!!!! t cat agc a t a g t-aa t-a t-a g-c a-t t a t a tga </pre> | <pre> t t-a a-t t-a g-c t+g t-a t-a tg t tatta t ag g !!!!! a g acg ataat t a !!!!! t at a tgc a g a a g+tt t-a g-c a-t a-t t a t a tag </pre> | <pre> a c-g a-t a-t g+t t-a a-t tt g atac a ag a !!!!! a g ttcg tttg c a +!!!! t tg g gagt g a a g t-aa c-g t-a c-g a-t t t t a tac </pre> |
| tRNA-Pro(tgg)                                                                                                                              | tRNA-Ser(tga)                                                                                                                              | tRNA-Leu(tag)                                                                                                                                  | tRNA-Val(tac)                                                                                                                              |
