# Supplementary material for: Museomics allows comparative analyses of mitochondrial genomes in the family Gryllidae (Insecta, Orthoptera) and confirms its phylogenetic relationships
Source: PeerJ. 2024 Aug 8;12:e17734. doi: 10.7717/peerj.17734 (PMC11317039; doi:10.7717/peerj.17734)
Supplement: Supplemental Information 3 [file peerj-12-17734-s003.pdf]

|                                                                                                                                                 |                                                                                                                                                   |                                                                                                                                         |                                                                        |                                                                                            |                                                                                                                                                                |
|-------------------------------------------------------------------------------------------------------------------------------------------------|---------------------------------------------------------------------------------------------------------------------------------------------------|-----------------------------------------------------------------------------------------------------------------------------------------|------------------------------------------------------------------------|--------------------------------------------------------------------------------------------|----------------------------------------------------------------------------------------------------------------------------------------------------------------|
| <pre> a t-a a-t t-a g-c t-a c-g t-a tt t ttatc a a a !!!!! g t tata aatag t g +!!!! a tt a gtat g t g a g.aa a-t g-c a-t a-t t a t a ttg </pre> | <pre> a-t g-c a-t a-t a-t a-t g+t a-t ta t tttcc a a a !!!!! c a tcga aaagg c a !!!!! t ta a agct a a a t a ac t-a g-c g-c g-c t c t a cat </pre> | <pre> a a-t a-t a-t g-c t+g c-g t-a t t tttt a a !!!!! t a ttga aaaa g !!!!! t t t aact a a a a g.aa t+g a-t g-c c-g c a t a tca </pre> | <pre> t g-c g-c t+g t-a t-a t-a t-a t-a t-a t-a t-a c t t a gca </pre> | <pre> a g-c a-t t-a g+t g-c g-c g-c g-c g-c g-c g-c g-c t-a t-a t-a t-a t a t a gta </pre> | <pre> c g t-a a-t c-g t-a a-t a-t t.t t.t a-t t tttct t t tttct t ag g !!!!! a a acg aaaga a a !!!!! t a a tgc a g a a a-tt t-a g-c a-t a-t c a t g taa </pre> |
| tRNA-Gln(ttg)                                                                                                                                   | tRNA-Met(cat)                                                                                                                                     | tRNA-Trp(tca)                                                                                                                           | tRNA-Cys(gca)                                                          | tRNA-Tyr(gta)                                                                              | tRNA-Leu(taa)                                                                                                                                                  |

|                                                                                                                                                           |                                                                                                                                             |                                                                                                                                        |                                                                                                                                         |                                                                                                                                         |                                                                                                                                                     |
|-----------------------------------------------------------------------------------------------------------------------------------------------------------|---------------------------------------------------------------------------------------------------------------------------------------------|----------------------------------------------------------------------------------------------------------------------------------------|-----------------------------------------------------------------------------------------------------------------------------------------|-----------------------------------------------------------------------------------------------------------------------------------------|-----------------------------------------------------------------------------------------------------------------------------------------------------|
| <pre> a t-a c-g a-t t-a c-g a-t g-c a-t g-c a-t aa t tcatt c a g !!!!! a a tca agtaa a a !!!!! tt g agt a ta a a a att t-a g-c g-c t-a c a t a ctt </pre> | <pre> a a-t a-t g-c a-t a-t a-t t-a c t taata a a !!!!! a a attg attat a t !!!!! t a t taac t a a a t-aa t-a a-t a-t a-t a t t a gtc </pre> | <pre> a g+t t-a c-g t-a a-t t-a a t aatt aa a !!!!! t a tatg ttaa a t +!!!! t g a gtac g a a a t-at t-a t-a g-c a-t t a t a tcc </pre> | <pre> a a-t g+t g-c a-t t-a t-a a t taact a a a !!!!! t c attg attga t c !!!!! t t taac g a a a t-aa t-a t-a g-c a-t a c t a tgc </pre> | <pre> a a-t a-t a-t t-a a-t a-t g-c t a ccaa t a !!!!! t t tacg gggt a c !!!!! a a atgc a c a g t-aa t-a c-g a-t a-t t c t a tcg </pre> | <pre> a t-a a-t t-a t-a t-a a-t t-a a-t t ttatt t ttatt a a !!!!! t t ttgt aataa t !!!!! t t g aaac a a g g g-ca t+g a-t t-a a-t t t t a ttc </pre> |
| tRNA-Lys(ctt)                                                                                                                                             | tRNA-Asp(gtc)                                                                                                                               | tRNA-Gly(tcc)                                                                                                                          | tRNA-Ala(tgc)                                                                                                                           | tRNA-Arg(tcg)                                                                                                                           | tRNA-Glu(ttc)                                                                                                                                       |

|                                                                                                                                 |                                                                                                                                              |                                                                                                                                                   |                                                                                                                                            |                                                                                                                                                 |                                                                                                                                                |
|---------------------------------------------------------------------------------------------------------------------------------|----------------------------------------------------------------------------------------------------------------------------------------------|---------------------------------------------------------------------------------------------------------------------------------------------------|--------------------------------------------------------------------------------------------------------------------------------------------|-------------------------------------------------------------------------------------------------------------------------------------------------|------------------------------------------------------------------------------------------------------------------------------------------------|
| <pre> t g-c a-t a-t g-c t+g a-t a a tt tga attgcc a ag !!!!! g t tagcgg t aa t tt ag t a-ttc t-a g+t g+t g-c c a t a gct </pre> | <pre> g t-a t-a a-t a-t t-a t-a g-c t a ctt a aa a !!!!! a a cca gaa t g !!!!! t tt t ggt t gga a a t-atc a-t t-a t-a a-t t a t a gtt </pre> | <pre> t t-a a-t t-a t-a t+g a-t a-t g-c g t ccg ta a !!!!! t a ttcg ggct t a +!!!! a t a gagt g a a g t-ag a-t g-c a-t t-a a-t t a t g gaa </pre> | <pre> t a-t t-a t+g t-a a-t a-t t-a t t tatta ga a !!!!! a g ttgt ataat c +!!!! a t t gaac g a g g t+ga t-a g-c a-t t-a t t t a gtg </pre> | <pre> c t a-t g-c t-a t-a t-a t-a t-a t-a t t ttc aa a !!!!! a a ttgt aag a a !!!!! t t a aaac t ta a a t-aa t-a g-c g-c t-a c a t a tgt </pre> | <pre> a t-a c-g a-t g-c a-t g-c a-t g+t t t tttct aa a +!!!! a a ttgt gagg a !!!!! t t t aaat a ta a g t-at t-a a-t a-t t-a t g t g tgg </pre> |
| tRNA-Ser(gct)                                                                                                                   | tRNA-Asn(gtt)                                                                                                                                | tRNA-Phe(gaa)                                                                                                                                     | tRNA-His(gtg)                                                                                                                              | tRNA-Thr(tgt)                                                                                                                                   | tRNA-Pro(tgg)                                                                                                                                  |

|                                                                                                                                              |                                                                                                                                                |                                                                                                                                                |                                                                                                                                           |
|----------------------------------------------------------------------------------------------------------------------------------------------|------------------------------------------------------------------------------------------------------------------------------------------------|------------------------------------------------------------------------------------------------------------------------------------------------|-------------------------------------------------------------------------------------------------------------------------------------------|
| <pre> t a-t a-t g-c t-a t-a a-t a-t t-a aat a tcct a c a !!!!! a a tcg agaa t t !!!!! ct agc a a a g t-aa t-a t-a g-c t-a t a t a tga </pre> | <pre> t t-a a-t t-a g-c t+g t-a t-a ta t tatta t ag g +!!!! a a acg gtaat c a !!!!! t at a tgc a g a a a-tt t-a g-c a-t a-t t a t a tag </pre> | <pre> a c-g a-t a-t a-t a-t a-t t-a tt g atac a ag a !!!!! a t ttcg ttgt c a +!!!! t tg g gagt g a a g t-ag c-g t-a c-g a-t t t t a tac </pre> | <pre> t t-a a-t a-t t-a g-c g+t a-t a t cgtaa ag g !!!!! c t tcc gcaat a !!!!! t t a agg a a g t c aat t-a a-t t-a c-g t g t a gat </pre> |
| tRNA-Ser(tga)                                                                                                                                | tRNA-Leu(tag)                                                                                                                                  | tRNA-Val(tac)                                                                                                                                  | tRNA-Ile(gat)                                                                                                                             |
